# Supplementary figures and images for: Forskolin Stimulates Estrogen Receptor (ER) α Transcriptional Activity and Protects ER from Degradation by Distinct Mechanisms
Source: Hindawi journal article supplement (doi:10.1155/2022/7690166), 2022-05-09

Supplement 2.

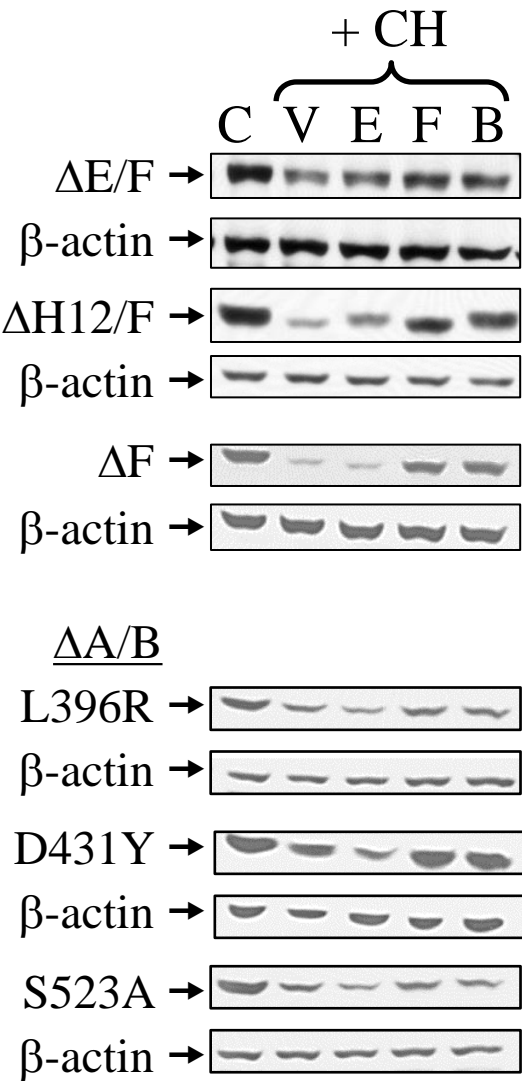

Supplement: f1 [file 7690166.f1.zip]

Supplement 1.

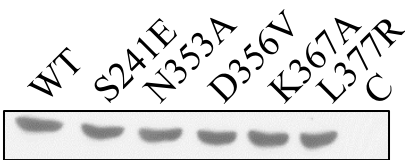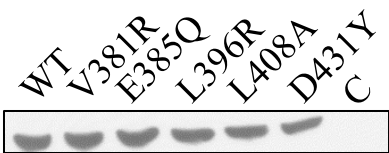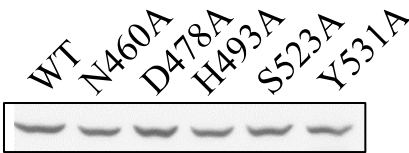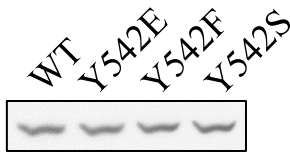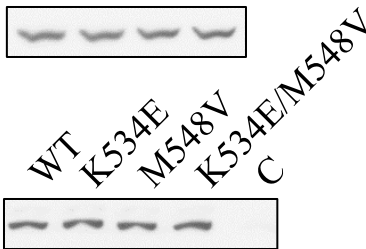

Supplement: f1 [file 7690166.f1.zip]
